# Supplementary material for: Polymer templated nanocrystalline titania network for solid state dye sensitized solar cells
Source: Royal Society of Chemistry journal article supplement (doi:10.1039/c0jm00916d), 2010-01-01
Supplement: c0jm00916d.pdf [file c0jm00916d.pdf]

# Polymer templated nanocrystalline titania network for solid state dye sensitized solar cells

*Johannes C. Brendel,<sup>a</sup> Yan Lu,<sup>b</sup> Mukundan Thelakkat<sup>a</sup>*

<sup>a</sup> Applied Functional Polymers, Macromolecular Chemistry I, University of Bayreuth, 95440 Bayreuth,  
Germany

<sup>b</sup> Physikalische Chemie I, University of Bayreuth, 95440 Bayreuth, Germany

## Electronic Supplementary Information (ESI)

### High resolution transmission electron microscopy

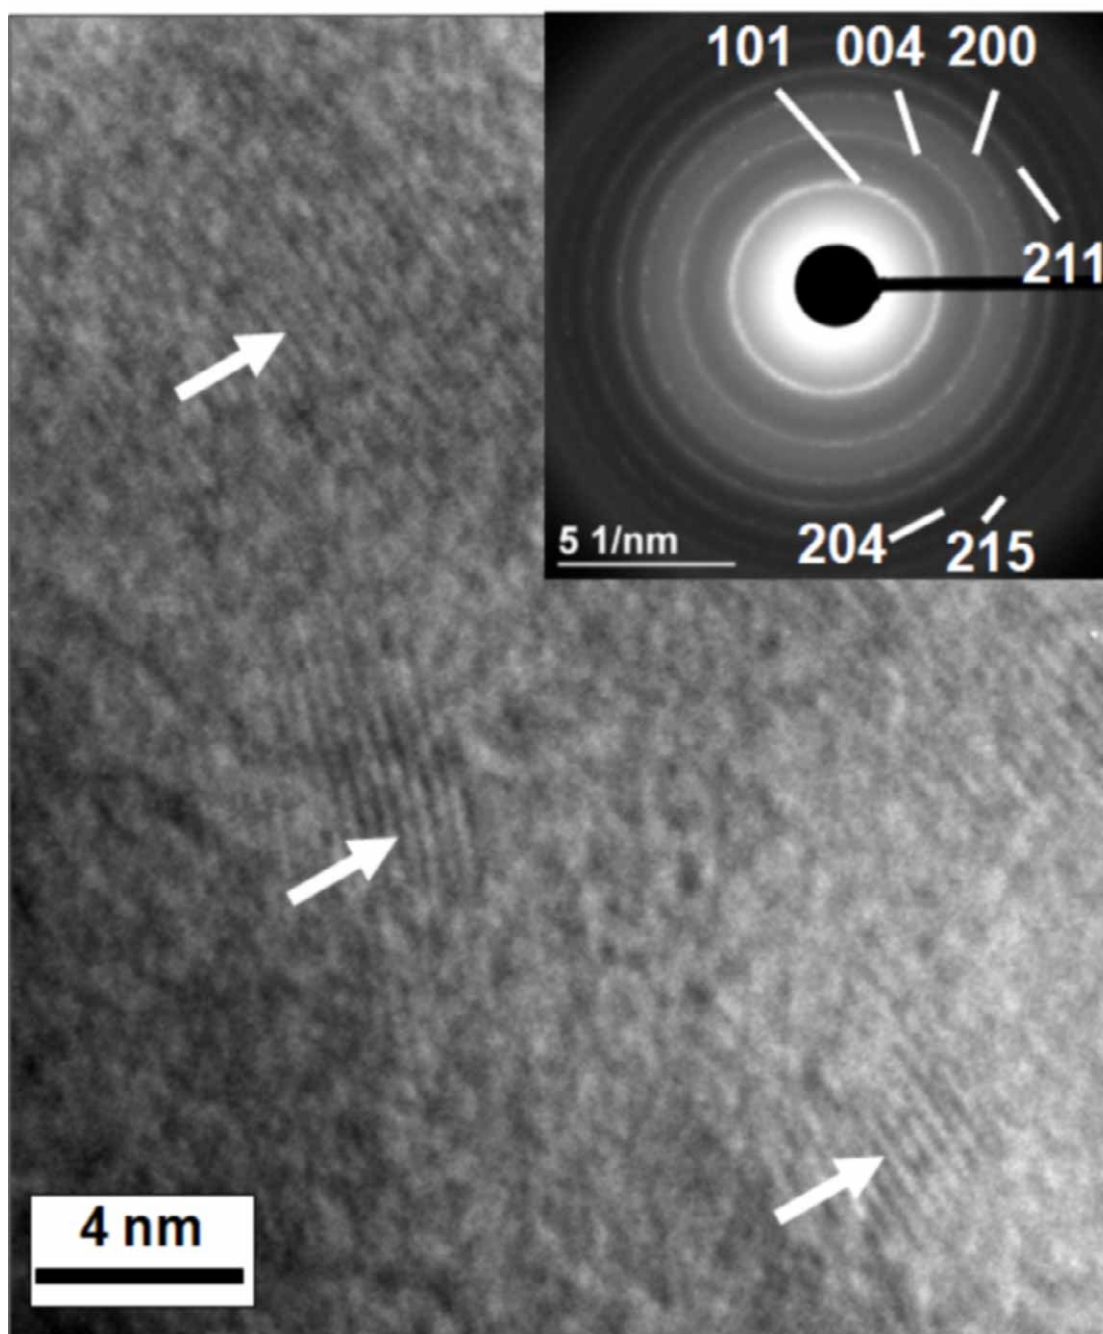

**Fig. S1** HR-TEM image of sample SPB-TiO<sub>2</sub>-1 (SPB/TEOT/water ratio of 1/4/4) and the selected area

electron diffraction (SAED) patterns of a single crystal immobilized within the brush. The diffraction rings consist with the anatase phase of  $\text{TiO}_2$ .

### EDX spectra of calcinated samples

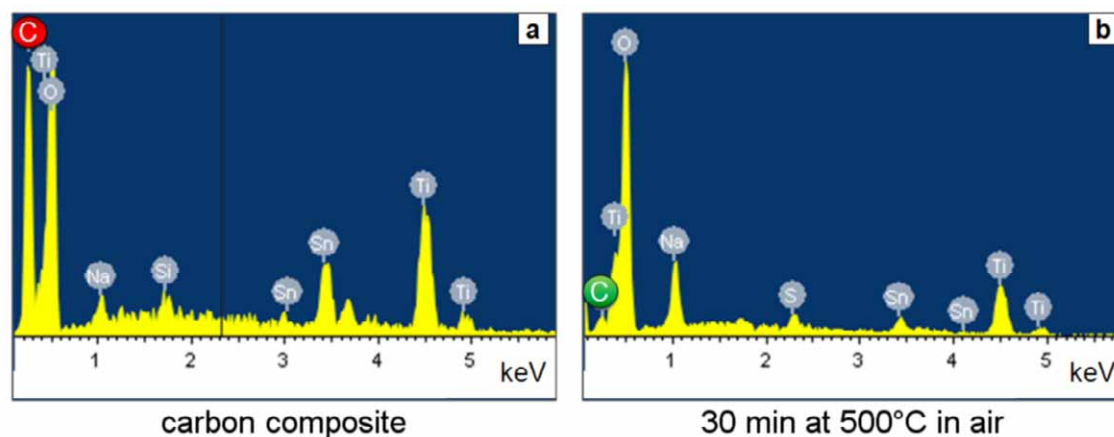

**Fig. S2** EDX spectra of the SPB- $\text{TiO}_2$  films were recorded after calcination under argon and after the final removal of the carbon composite in air. A high carbon peak at 0.2 keV was obtained after heating under Argon for 5 h at 500 °C (left). The right spectrum indicates the complete removal of the carbon after 30 min at 500 °C under air.

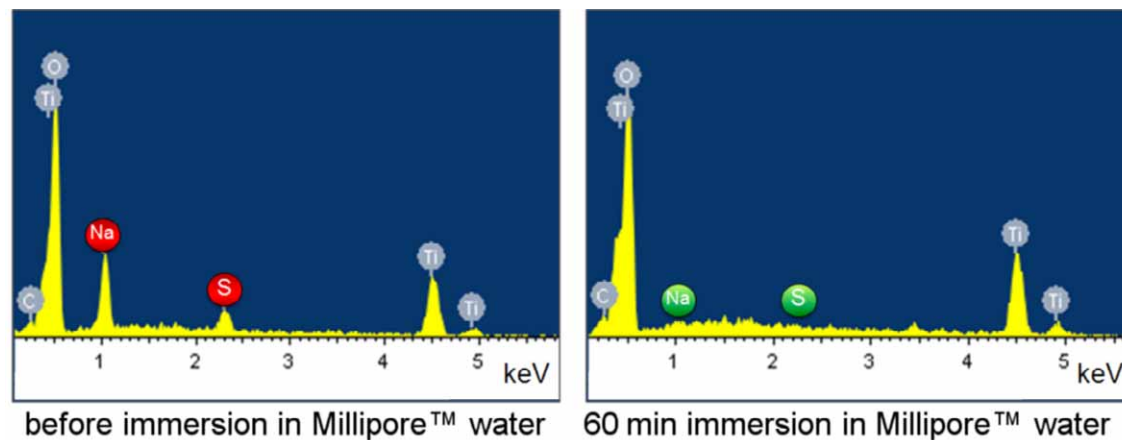

**Fig. S3** Further inorganic impurities as sodium and sulphur were detected via EDX analysis. These rests of the sulfonate groups were removed by immersing the samples in Millipore® water for

1 h. The respective EDX spectra display the complete removal of those impurities.

### TGA measurements

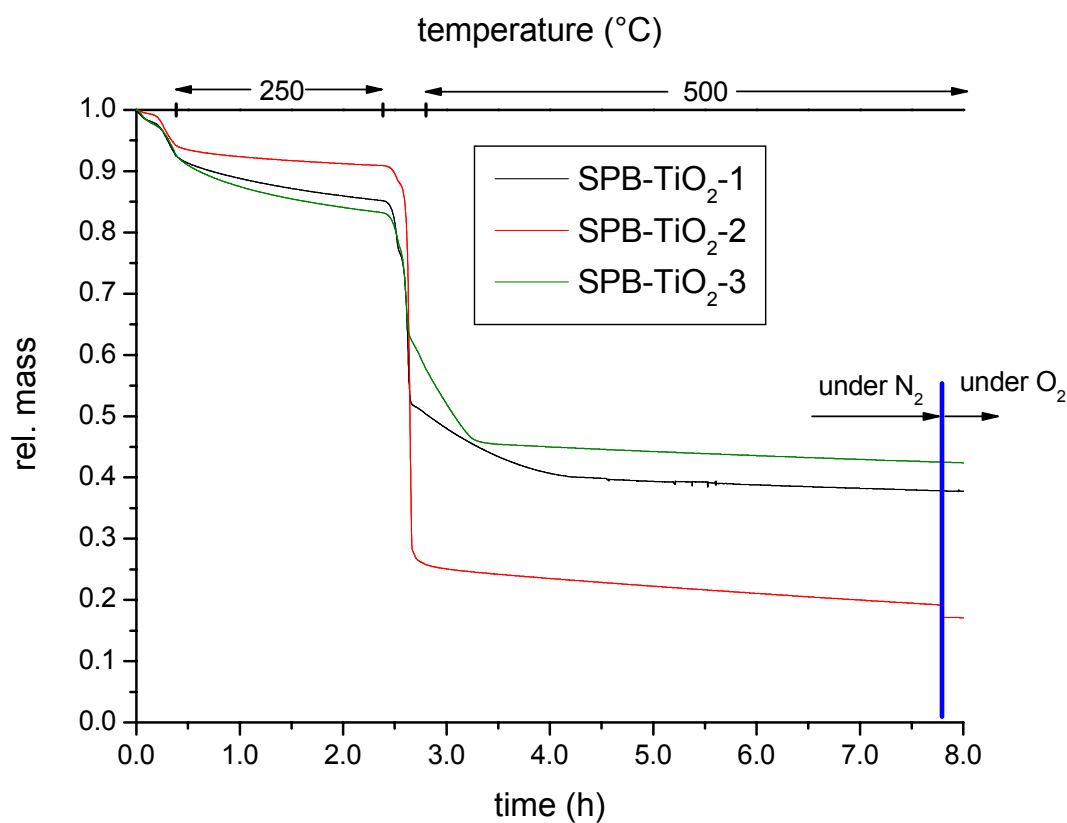

**Fig. S4** TGA measurements of the samples SPB-TiO<sub>2</sub>-1, SPB-TiO<sub>2</sub>-2 and SPB-TiO<sub>2</sub>-3. The program for the TGA measurement was adjusted to the two-step calcination program (under N<sub>2</sub>: heating to 250 °C at a ramp of 10 K/min, keeping at 250 °C for 2 h, further heating to 500 °C at a ramp of 10 K/min, keeping at 500 °C for 5 h, flush with O<sub>2</sub> and keep for another 30 min at 500 °C). The residual relative masses of the individual samples are summarized in table S1.

**Table S1** Relative residual masses determined by TGA measurements.

| Sample                   | TiO <sub>2</sub> content in SPB-TiO <sub>2</sub> composite |
|--------------------------|------------------------------------------------------------|
| SPB-TiO <sub>2</sub> -1d | 37.68%                                                     |
| SPB-TiO <sub>2</sub> -2  | 17.01%                                                     |
| SPB-TiO <sub>2</sub> -3  | 42.23%                                                     |
